# Supplementary material for: The Asian Rice Gall Midge (Orseolia oryzae) Mitogenome Has Evolved Novel Gene Boundaries and Tandem Repeats That Distinguish Its Biotypes
Source: PubMed Central journal article supplement (PMC4520695; doi:10.1371/journal.pone.0134625), 2015-07-30
Supplement: pone.0134625.s011.pdf [file pone.0134625.s011.pdf]

**S2 Table. Accession numbers of all the species used for comparison in the present study**

| <b>Species</b>                        | <b>GenBank Accession numbers</b> |
|---------------------------------------|----------------------------------|
| <i>Abispa ephippium</i>               | NC_011520                        |
| <i>Aedes aegypti</i>                  | NC_010241                        |
| <i>Anopheles gambiae</i>              | NC_002084                        |
| <i>Apis mellifera</i>                 | NC_001566                        |
| <i>Bothriometopus macrocnemis</i>     | NC_009983                        |
| <i>Campanulotes bidentatus compar</i> | NC_007884                        |
| <i>Culex quinquefasciatus</i>         | NC_014574                        |
| <i>Delias hyparete</i>                | NC_020428                        |
| <i>Diadegma semiclausum</i>           | NC_012708                        |
| <i>Diuraphis noxia</i>                | NC_022727                        |
| <i>Drosophila yakuba</i>              | NC_001322                        |
| <i>Helicoverpa armigera</i>           | NC_014668                        |
| <i>Heterodoxus macropus</i>           | NC_002651                        |
| <i>Laodelphax striatella</i>          | JX880068                         |
| <i>Locusta migratoria</i>             | NC_001712                        |
| <i>Mayetiola destructor</i>           | GQ387648                         |
| <i>Nilaparvata lugens</i>             | NC_021748                        |
| <i>Orseolia oryzae</i>                | KM888183                         |
| <i>Panonychus citri</i>               | HM189212                         |
| <i>Rhopalomyia pomum</i>              | GQ387649                         |
| <i>Schistocerca gregaria gregaria</i> | NC_013240                        |
| <i>Schizaphis graminum</i>            | NC_006158                        |
| <i>Tetranychus urticae</i>            | NC_010526                        |
| <i>Thrips imaginis</i>                | NC_004371                        |
| <i>Tribolium castaneum</i>            | AJ312413                         |
| <i>Vanhornia eucnemidarum</i>         | NC_008323                        |
