# Supplementary material for: The Asian Rice Gall Midge (Orseolia oryzae) Mitogenome Has Evolved Novel Gene Boundaries and Tandem Repeats That Distinguish Its Biotypes
Source: PubMed Central journal article supplement (PMC4520695; doi:10.1371/journal.pone.0134625), 2015-07-30
Supplement: pone.0134625.s012.pdf [file pone.0134625.s012.pdf]

**S3 Table. A comparison of start and stop codons for PCGs across different species in Diptera**

| Gene  | Start Codon      |                      |                 |                  |                            |                   |                   | Stop Codon       |                      |                 |                  |                            |                   |                   |
|-------|------------------|----------------------|-----------------|------------------|----------------------------|-------------------|-------------------|------------------|----------------------|-----------------|------------------|----------------------------|-------------------|-------------------|
|       | <i>O. oryzae</i> | <i>M. destructor</i> | <i>R. pomum</i> | <i>D. yakuba</i> | <i>C. quinquefasciatus</i> | <i>A. gambiae</i> | <i>A. aegypti</i> | <i>O. oryzae</i> | <i>M. destructor</i> | <i>R. pomum</i> | <i>D. yakuba</i> | <i>C. quinquefasciatus</i> | <i>A. gambiae</i> | <i>A. aegypti</i> |
| Atp6  | ATG              | ATG                  | ATG             | ATG              | ATG                        | ATG               | ATG               | TAA              | TAA                  | TAA             | TAA              | TAA                        | TAA               | TAA               |
| Atp8  | ATA              | ATT                  | ATT             | ATT              | ATA                        | ATC               | ATT               | TAA              | TAA                  | TAA             | TAA              | TAA                        | TAA               | TAA               |
| COI   | ATT              | ATT                  | N.A.            | TCG              | N.A.                       | N.A.              | TCG               | TAA              | TAA                  | TA-             | TAA              | T--                        | T--               | T--               |
| COII  | ATT              | ATA                  | ATA             | ATG              | ATG                        | ATG               | ATG               | TAA              | TAA                  | TAA             | T--              | T--                        | T--               | T--               |
| COIII | ATT              | ATA                  | TTA             | ATG              | ATG                        | ATG               | ATG               | TAA              | TAA                  | TAA             | TAA              | TA-                        | T--               | TA-               |
| CytB  | ATT              | ATT                  | ATA             | ATG              | ATG                        | ATG               | ATG               | TAA              | TAA                  | T--             | TAA              | T--                        | TAA               | T--               |
| ND1   | ATA              | ATG                  | ATA             | ATA              | ATA                        | ATA               | ATA               | TAA              | TAA                  | TAA             | TAA              | TAA                        | TAA               | TAA               |
| ND2   | ATT              | ATA                  | ATA             | ATT              | ATC                        | ATC               | ATT               | TAA              | TAA                  | TAA             | T--              | TAA                        | TAA               | TAA               |
| ND3   | ATT              | ATT                  | ATA             | ATT              | ATA                        | ATA               | ATT               | TAA              | TAA                  | TAA             | TAA              | T--                        | TAA               | TA-               |
| ND4   | ATA              | ATT                  | ATA             | ATG              | ATG                        | ATG               | ATG               | TAA              | TAG                  | T--             | T--              | TA-                        | T--               | TAA               |
| ND4L  | ATT              | TTG                  | ATA             | ATG              | ATG                        | ATA               | ATG               | TAA              | TAA                  | TAA             | TAA              | TAA                        | TAA               | TAA               |
| ND5   | ATA              | ATT                  | ATT             | ATT              | ATC                        | ATG               | ATC               | TAA              | TAA                  | TAA             | T--              | TAA                        | TAA               | TAA               |
| ND6   | ATA              | ATG                  | ATA             | ATT              | ATA                        | ATT               | ATT               | TAG              | TAA                  | TAA             | TAA              | TAA                        | TAA               | TAA               |

Note: Accession numbers of the mitogenomes used in this comparison are provided in S2 Table
