# Supplementary material for: The Asian Rice Gall Midge (Orseolia oryzae) Mitogenome Has Evolved Novel Gene Boundaries and Tandem Repeats That Distinguish Its Biotypes
Source: PubMed Central journal article supplement (PMC4520695; doi:10.1371/journal.pone.0134625), 2015-07-30
Supplement: pone.0134625.s015.pdf [file pone.0134625.s015.pdf]

**S6 Table. A Comparison of the repeats present in control region of different species of Diptera**

| <b>Species</b>             | <b>Length of the Motif (bp)</b> | <b>No. of Repeats</b> |
|----------------------------|---------------------------------|-----------------------|
| <i>O. oryzae</i>           | 97                              | 5.5                   |
| <i>M. destructor</i>       | 79                              | 7.7                   |
| <i>R. pomum</i>            | 96                              | 3.2                   |
| <i>D. yakuba</i>           | 19                              | 3.1                   |
| <i>A. gambiae</i>          | 21                              | 3                     |
| <i>C. quinquefasciatus</i> | 18                              | 3.6                   |
| <i>A. aegypti</i>          | 43                              | 4.1                   |

Note: Accession numbers of the mitogenomes used in this comparison are mentioned in S2 Table
