# Supplementary material for: The Asian Rice Gall Midge (Orseolia oryzae) Mitogenome Has Evolved Novel Gene Boundaries and Tandem Repeats That Distinguish Its Biotypes
Source: PubMed Central journal article supplement (PMC4520695; doi:10.1371/journal.pone.0134625), 2015-07-30
Supplement: pone.0134625.s018.pdf [file pone.0134625.s018.pdf]

**S9 Table. The location of the mtTERM sequence across different species in Diptera**

| <b>Organism</b>               | <b>Location</b>   | <b>Strand</b> |
|-------------------------------|-------------------|---------------|
| <i>Orseolia oryzae</i>        | ND1- <i>trnL1</i> | Major         |
| <i>Mayetiola destructor</i>   | Absent            | N.A.          |
| <i>Rhopalomyia pomum</i>      | <i>trnP-trnI</i>  | Major         |
| <i>Drosophila yakuba</i>      | ND4L- <i>trnT</i> | Minor         |
| <i>Culex quinquefasciatus</i> | <i>trnS2-ND1</i>  | Major         |
| <i>Anopheles gambiae</i>      | <i>trnS2-ND1</i>  | Major         |
| <i>Aedes aegypti</i>          | <i>trn S2-ND1</i> | Major         |

Note: Accession numbers of the mitogenomes used in this comparison are mentioned in the S2 Table
