# Supplementary material for: The Asian Rice Gall Midge (Orseolia oryzae) Mitogenome Has Evolved Novel Gene Boundaries and Tandem Repeats That Distinguish Its Biotypes
Source: PLOS journal article supplement (doi:10.1371/journal.pone.0134625), 2015-07-30
Supplement: S7 (10.1371/journal.pone.0134625.s007) [file journal.pone.0134625.s007]

## S1 File – Supporting Information

### Non-coding regions in the gall midge and comparison of different PCG lengths in dipteran mitogenomes

A total of 15 non-coding intergenic spacers were found in the mitogenome of *O. oryzae* accounting for a total of 1,011 bp in the 15,286 bp mitogenome. The longest spacer (155 bp), was located between *trnI* and COI and contained a tandem repeat (with a motif ‘ATTTATATTTAA’) repeated >5 times. A comparison of the intergenic spacers of *O. oryzae* with intergenic spacers from other insect mitogenomes could not be carried out due to the presence of unique gene boundaries arising due to gene rearrangements in the mitogenome of *O. oryzae*.

In addition, we identified another intergenic spacer containing two penta-nucleotide repeats with the motifs ‘TAAAA’ and ‘AAATT’. The two motifs were iterated 25 and 49 times, respectively and were located between *trnW* and *trnA*. The total percentage of the non-coding region (excluding the control region) was found to be 6.6% that is much higher as compared to other dipterans (Fig 5). The non-coding regions were also screened for the presence of tRNAs. Two *trnL* were detected between *trnI* and COI. Both the tRNAs contained introns in the anti-codon loop region and were predicted to be non-functional copies of the tRNA.

Another feature of the insect mitogenomes is the presence of a 7-bp conserved motif that has been proposed to be the binding site for the mitochondrial termination transcription factor (mtTERM). In the *O. oryzae* mitogenome the mtTERM motif was located between ND1 and *trnLI*. The mitogenome sequences of other insects were also screened for the presence and location of this mtTERM motif. Results (S9 Table) indicated that all three mosquitoes harbour this sequence between *trnS2* and ND1 while it is located between ND4L and *trnT* in *Drosophila yakuba* and between *trnP* and *trnL1* in *R. pomum*. However, this motif could not be identified in *M. destructor*.

### Comparison of mitochondrial gene sizes across Diptera

| Organism                      | Gene Sizes (bp) |      |     |      |      |      |     |      |      |      |       |      |      |                |
|-------------------------------|-----------------|------|-----|------|------|------|-----|------|------|------|-------|------|------|----------------|
|                               | ND1             | ND2  | ND3 | ND4  | ND4I | ND5  | ND6 | CtyB | COI  | COII | COIII | ATP6 | ATP8 | Control Region |
| <i>Orseolia oryzae</i>        | 903             | 969  | 342 | 1185 | 300  | 1698 | 456 | 1128 | 1539 | 669  | 780   | 678  | 147  | 588            |
| <i>Mayetiola destructor</i>   | 905             | 977  | 350 | 1310 | 269  | 1674 | 482 | 1127 | 1535 | 677  | 782   | 671  | 155  | 603            |
| <i>Rhopalomyia pomum</i>      | 905             | 977  | 350 | 1296 | 272  | 1664 | 467 | 1116 | 1537 | 674  | 782   | 671  | 155  | 362            |
| <i>Drosophila yakuba</i>      | 974             | 1023 | 353 | 1338 | 290  | 1719 | 524 | 1136 | 1535 | 684  | 788   | 674  | 161  | 1076           |
| <i>Culex quinquefasciatus</i> | 956             | 1022 | 354 | 1342 | 296  | 1745 | 515 | 1134 | 1536 | 684  | 787   | 680  | 152  | 703            |
| <i>Anopheles gambiae</i>      | 944             | 1025 | 353 | 1341 | 305  | 1742 | 524 | 1136 | 1536 | 684  | 786   | 680  | 161  | 518            |
| <i>Aedes aegypti</i>          | 941             | 1025 | 328 | 1343 | 296  | 1742 | 521 | 1134 | 1536 | 684  | 787   | 680  | 161  | 1882           |
